# Supplementary material for: Aryl hydrocarbon receptor (AHR) is a potential tumour suppressor in pituitary adenomas
Source: PubMed Central journal article supplement (PMC5541251; doi:10.1530/erc-17-0112), 2017-06-22

**A**

Luciferase/Renilla fold change over untreated cells

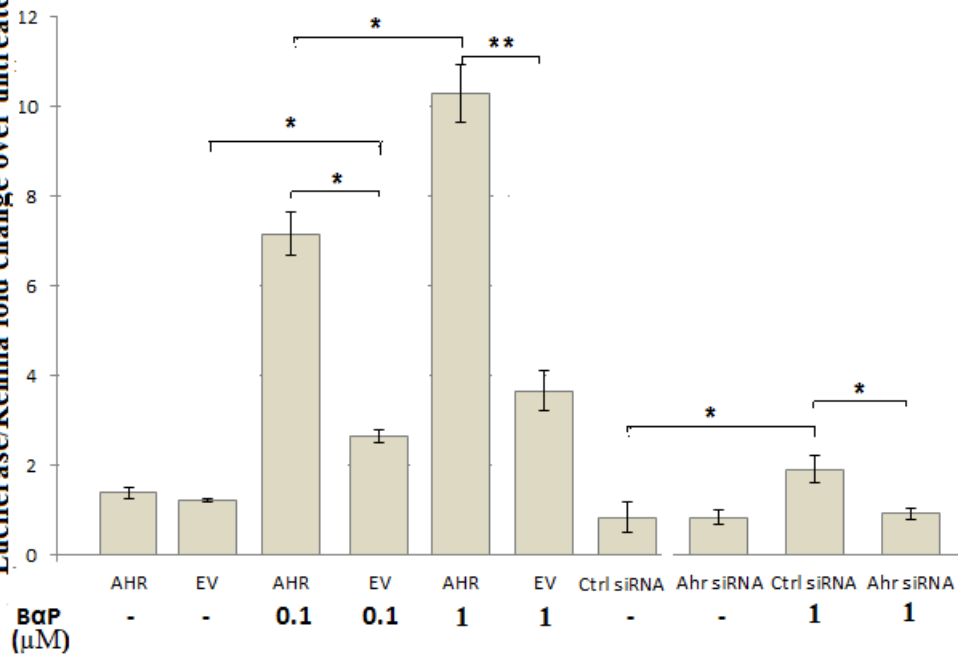**B**

Fold expression change over EV

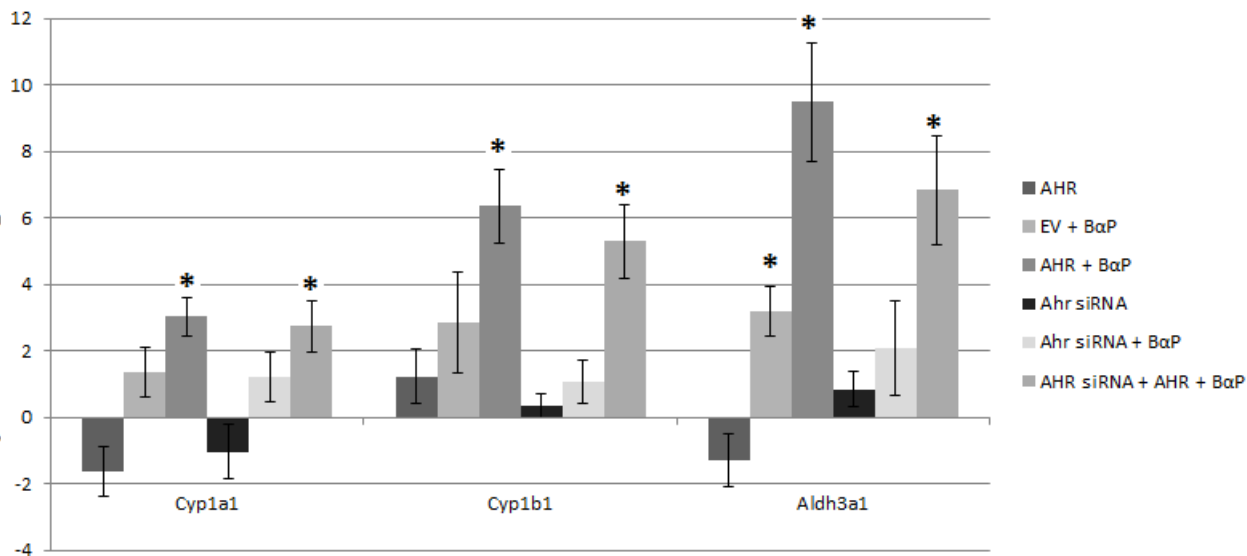

Supplement: erc-24-445-s002.pdf [file erc-24-445-s002.pdf]
